# Supplementary material for: Gold nanoparticle-doped three-dimensional reduced graphene hydrogel modified electrodes for amperometric determination of indole-3-acetic acid and salicylic acid
Source: Royal Society of Chemistry journal article supplement (doi:10.1039/c9nr01309a), 2019-01-01
Supplement: c9nr01309a1.pdf [file c9nr01309a1.pdf]

1                                    **Electronic Supplementary Material**

2

3   **Gold nanoparticle-doped three-dimensional reduced**

4   **graphene hydrogel modified electrode for amperometric**

5   **determination of indole-3-acetic acid and salicylic acid**

6   Xiaodong Cao,<sup>a</sup> Xueting Zhu,<sup>a</sup> Shudong He,<sup>a</sup> Xuan Xu,<sup>b</sup> Yongkang Ye,<sup>\*a</sup> Sundaram

7   Gunasekaran,<sup>\*c</sup>

8   *<sup>a</sup> School of Food and Biological Engineering, Hefei University of Technology, Hefei*

9   *230009, China. E-mail: yongkang.ye@hfut.edu.cn*

10   *<sup>b</sup> School of Chemistry and Molecular Engineering, Nanjing Tech University, Nanjing*

11   *211816, China*

12   *<sup>c</sup> Department of Biological Systems Engineering, University of Wisconsin-Madison,*

13   *Madison, WI 53706, USA. E-mail: guna@wisc.edu*

15 The effect of scan rate on the oxidation of IAA on AuNPs-GH/GCE

16

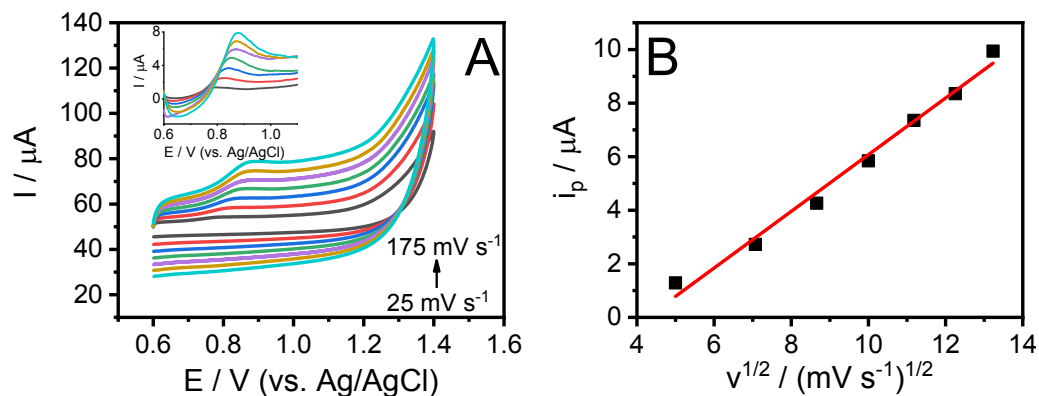

17

18

19 **Fig. S1** Cyclic voltammograms (CVs) of AuNPs-GH/GCE in 0.1 mol L<sup>-1</sup> PBS (pH

20 2.5) containing 80 μM IAA at various scan rate (from bottom to top: 25, 50, 75, 100,

21 125, 150 and 175 mV s<sup>-1</sup>). Inset: the first segments of the corresponding CVs

22 corrected by background subtraction. (B) Plots of the anodic peak currents vs. square

23 root of scan rate (v<sup>1/2</sup>).

25 The effect of scan rate on the oxidation of SA on AuNPs-GH/GCE

26

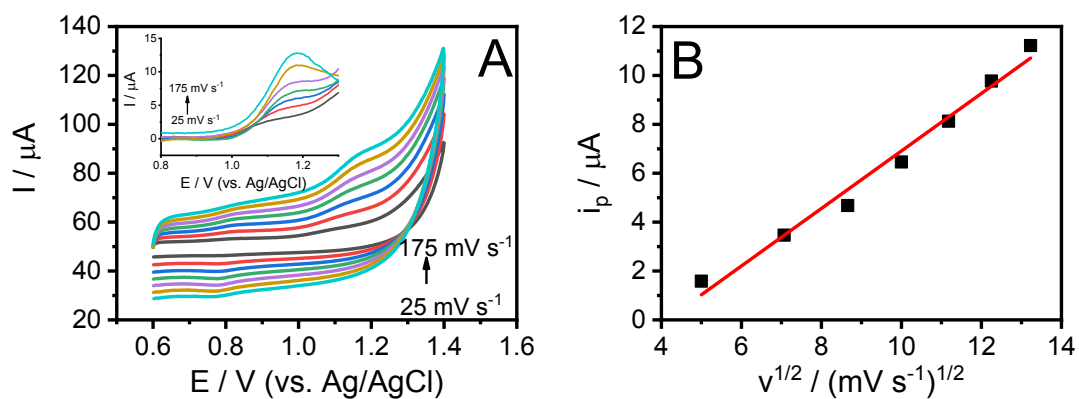

27

28

29 **Fig. S2** CVs of AuNPs-GH/GCE in 0.1 mol L<sup>-1</sup> PBS (pH 2.5) containing 60 μM SA at

30 various scan rate (from bottom to top: 25, 50, 75, 100, 125, 150 and 175 mV s<sup>-1</sup>). Inset:

31 the first segments of the corresponding CVs corrected by background subtraction. (B)

32 Plots of the anodic peak currents vs. square root of scan rate ( $v^{1/2}$ ).

33 Parameter optimization for amperometric detection of IAA and SA

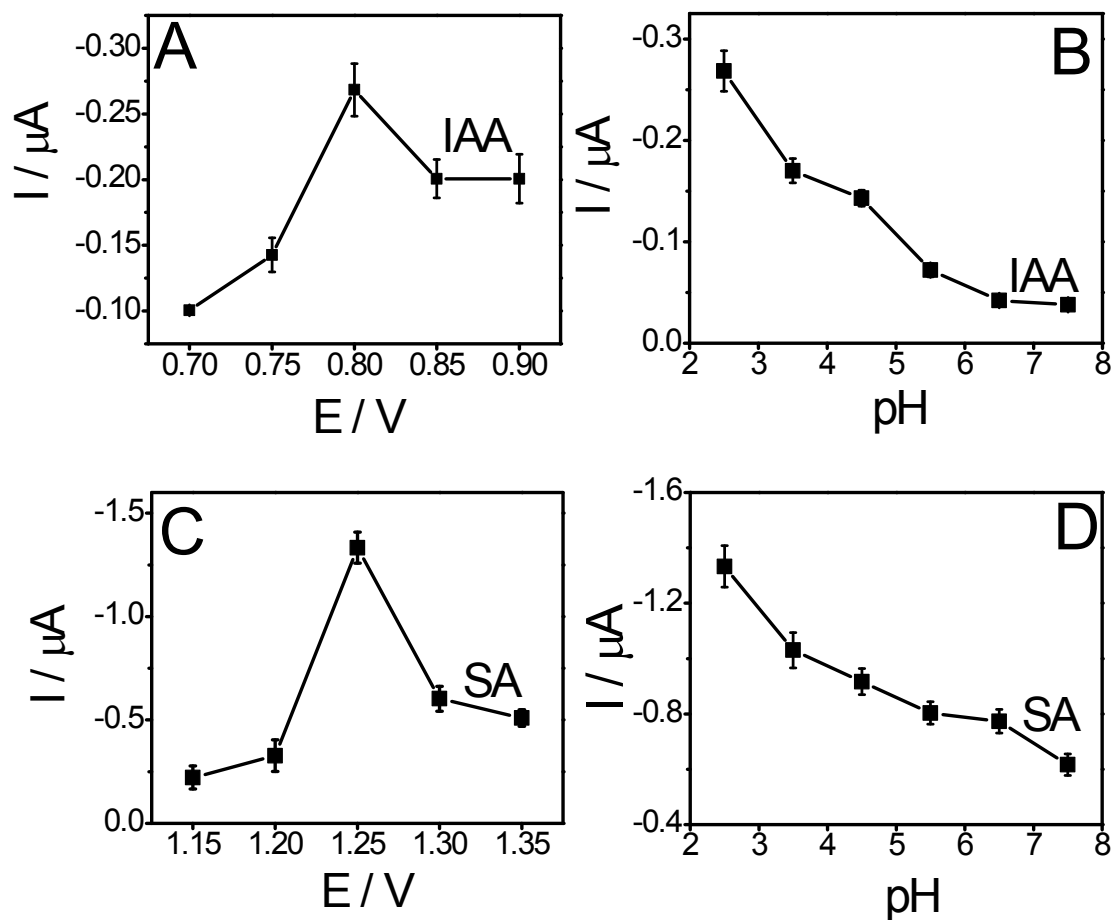

34

35 **Fig. S3** Work potential optimization for amperometric detection of IAA (A) and SA

36 (C). The pH value optimization for amperometric detection of IAA (B) and SA (D).

37 The concentrations of IAA and SA were 20  $\mu\text{M}$ .

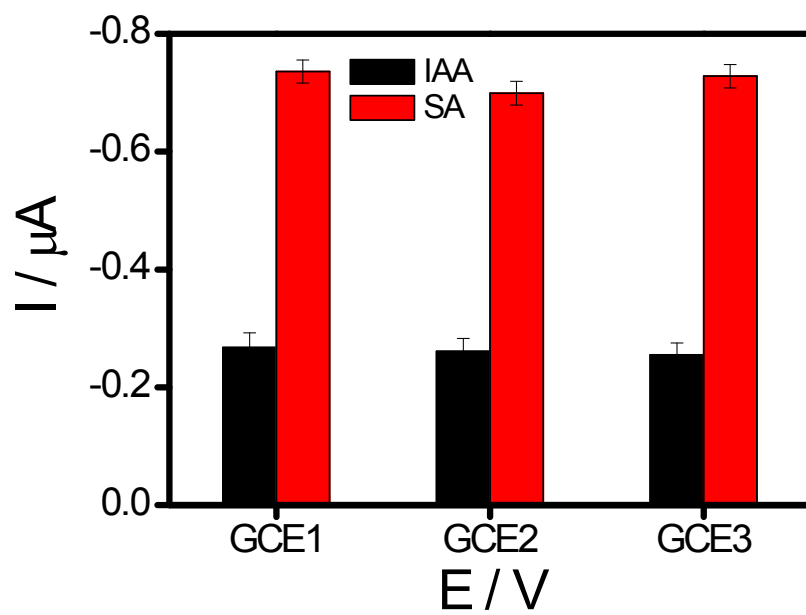

39

40 **Fig. S4** The fabrication reproducibility of the sensors.

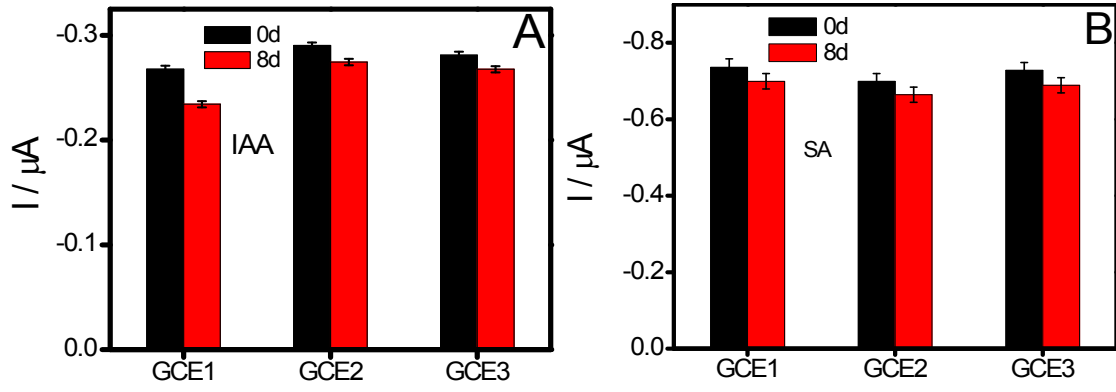

42

43 **Fig. S5** Stability of the sensors.

45 **Table S1** The average particle size of AuNPs in GHs prepared under various  
46 temperature. The data were obtained from XRD associated to Au (111) plane.

| Reaction temperature / °C | Particle size / nm |
|---------------------------|--------------------|
| 100                       | 14.5               |
| 120                       | 14.9               |
| 140                       | 15.2               |
| 160                       | 16.6               |
| 180                       | 17.9               |

48 **Table S2** The calculated d-spacing value of the C (002) plane of AuNPs-GHs  
49 prepared at various temperature and GH at 140 °C.

| Reaction temperature / °C | 2 $\theta$ / ° | d-spacing / nm |
|---------------------------|----------------|----------------|
| 100                       | 21.03          | 0.422          |
| 120                       | 23.92          | 0.372          |
| 140                       | 24.87          | 0.357          |
| 160                       | 24.90          | 0.357          |
| 180                       | 25.40          | 0.350          |
| GH-140                    | 23.10          | 3.890          |



51

**Table S3** Results of the recovery analysis of IAA and SA in unknown samples ( $n = 3$ )<sup>a</sup>

| Group | IAA added ( $\mu\text{M}$ ) | SA added ( $\mu\text{M}$ ) | IAA detected ( $\mu\text{M}$ ) | SA detected ( $\mu\text{M}$ ) | IAA recovery (%)  | SA recovery (%)  |
|-------|-----------------------------|----------------------------|--------------------------------|-------------------------------|-------------------|------------------|
| 1     | a                           | b                          | 1.35                           | 2.01                          | 95.50 $\pm$ 5.98  | 96.95 $\pm$ 4.53 |
|       | 0.5                         | 0.50                       | 1.77 $\pm$ 0.11                | 2.43 $\pm$ 0.11               |                   |                  |
|       | c                           | d                          | 3.11                           | 3.28                          |                   |                  |
| 2     | 5                           | 5                          | 7.75 $\pm$ 0.19                | 7.86 $\pm$ 0.18               | 95.60 $\pm$ 2.29  | 94.93 $\pm$ 2.15 |
|       | e                           | f                          | 2.38                           | 2.26                          |                   |                  |
| 3     | 15                          | 15                         | 17.58 $\pm$ 0.39               | 16.96 $\pm$ 0.73              | 101.15 $\pm$ 2.22 | 98.26 $\pm$ 4.21 |

52 <sup>a</sup> values reported are the averages of three independent analyses of each spiked sample.
